# Supplementary material for: The Impact of Gender and Age Differences and Infectious Disease Symptoms on Psychological Distress in Quarantined Asymptomatic or Mildly Ill COVID-19 Patients in Japan
Source: MDPI journal article supplement (doi:10.3390/ijerph19159083), 2022-07-26
Supplement: s1 [file s1]

## **Supplementary Material**

exit criteria

1. Symptomatic cases
  - a. 10 days have passed since the onset of symptoms and 72 hours have passed after the symptoms have abated.
  - b. 24 hours after symptom resolution, and two negative PCR test results are obtained at least 24 hours apart.
2. Asymptomatic carriers
  - a. 10 days have passed from the date of specimen collection.
  - b. After 6 days have passed from the date of specimen collection, two negative PCR test results are obtained at least 24 hours apart.

PCR, Polymerase Chain Reaction
